# Supplementary material
Source: PubMed Central journal article supplement (PMC3013297)

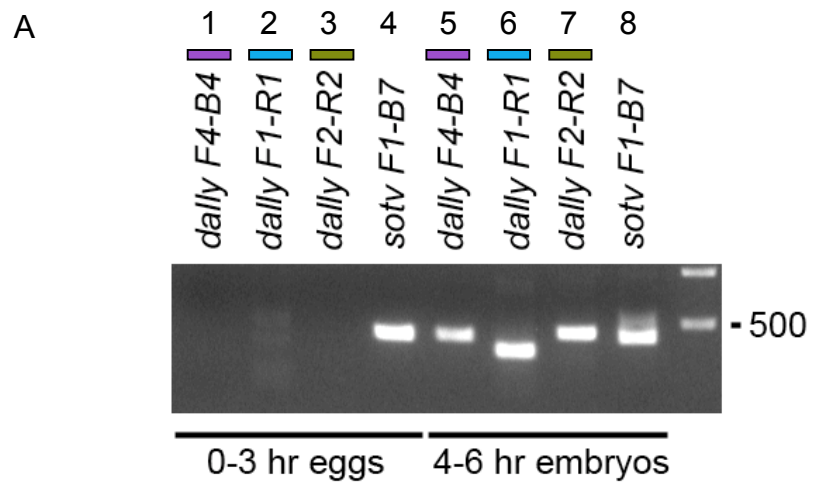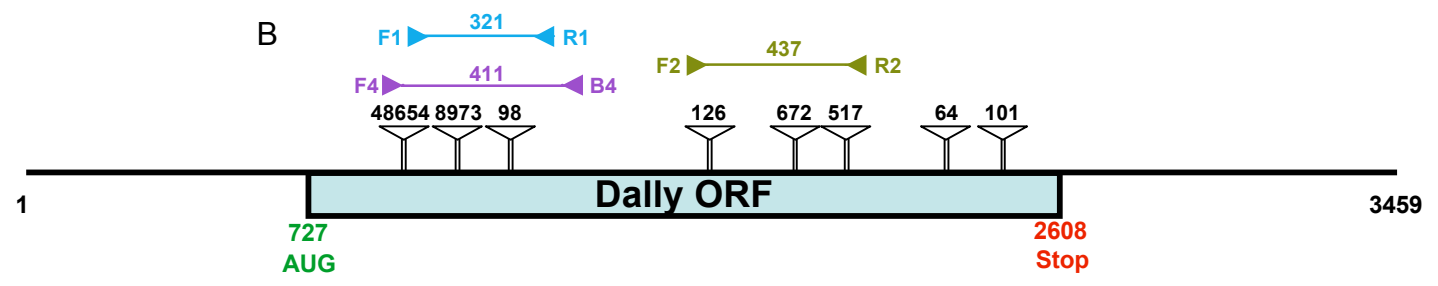

Supplement: NIHMS258565-supplement-figure.pdf [file NIHMS258565-supplement-figure.pdf]
